# Supplementary material for: A multicenter, prospective, observational study to determine association of mesangial C1q deposition with renal outcomes in IgA nephropathy
Source: PubMed Central journal article supplement (PMC7943768; doi:10.1038/s41598-021-84715-7), 2021-03-09
Supplement: 41598_2021_84715_MOESM1_ESM.pdf [file 41598_2021_84715_MOESM1_ESM.pdf]

# **A Multicenter, Prospective, Observational Study to Determine Association of Mesangial C1q Deposition with Renal Outcomes in IgA Nephropathy**

Li Tan, MD <sup>1,5,6</sup>, Yi Tang, MD <sup>1</sup>, Gaiqin Pei, MD <sup>1,6</sup>, Zhengxia Zhong, MD <sup>2,6</sup>, Jiaxing Tan, MD <sup>1,6</sup>, Ling Zhou, MD <sup>3,6</sup>, Dongmei Wen, MD <sup>4,6</sup>, David Sheikh-Hamad, MD <sup>5</sup>, Wei Qin, MD <sup>1</sup>

<sup>1</sup> Division of Nephrology, Department of Medicine, West China Hospital, Sichuan University, Chengdu, Sichuan, China.

<sup>2</sup> Division of Nephrology, Department of Medicine, Affiliated Hospital of Zunyi Medical University, Medical University, Zunyi, Guizhou, China.

<sup>3</sup> Division of Nephrology, Zigong Third People's Hospital, Zigong, Sichuan, China.

<sup>4</sup> Division of Nephrology, People's Hospital of Jianyang, Chengdu, Sichuan, China.

<sup>5</sup> Section of Nephrology, Department of Medicine, Baylor College of Medicine, Houston, TX, USA.

<sup>6</sup> West China School of Medicine, Sichuan University, Chengdu, Sichuan, China.

Correspondence to: Wei Qin, Division of Nephrology, Department of Medicine, West China Hospital, Sichuan University, Chengdu, Sichuan, China. Tel. 86-28-85422338, Fax +86-028-8542-3341. Email [qinweihx@scu.edu.cn](mailto:qinweihx@scu.edu.cn).

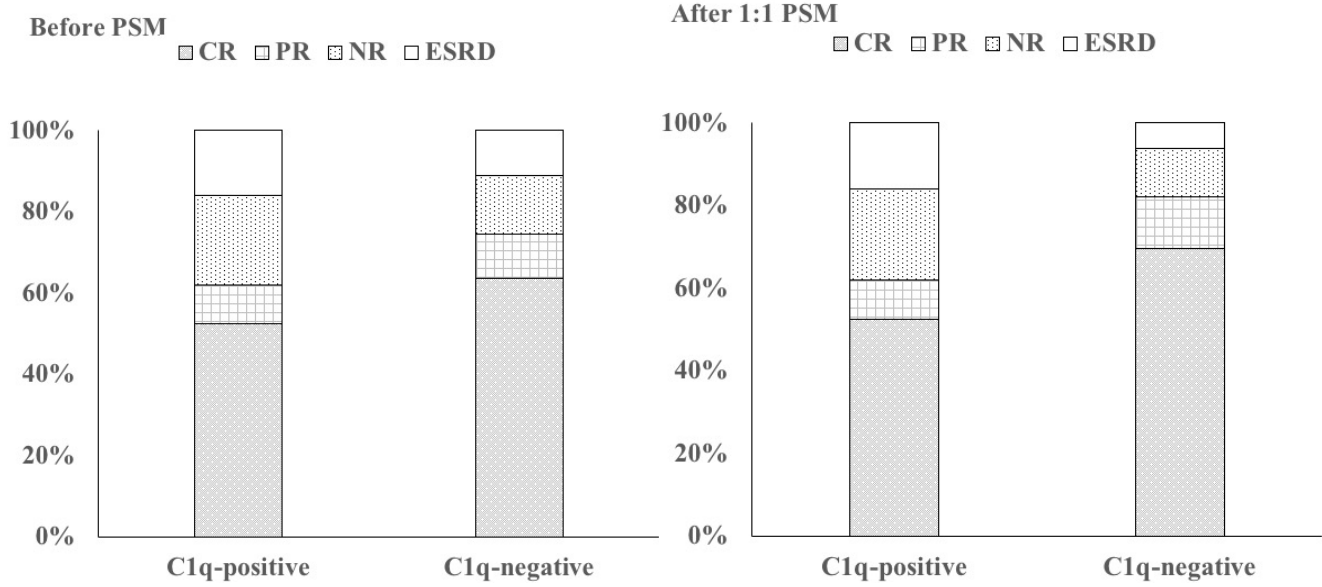

**Supplementary Fig. S1. Treatment response and renal outcome of IgAN patients.**

Abbreviations: CR, complete remission; PR, partial remission; NR, no response; ESRD, end stage renal disease.
