# Supplementary material for: A multicenter, prospective, observational study to determine association of mesangial C1q deposition with renal outcomes in IgA nephropathy
Source: PubMed Central journal article supplement (PMC7943768; doi:10.1038/s41598-021-84715-7), 2021-03-09
Supplement: 41598_2021_84715_MOESM2_ESM.pdf [file 41598_2021_84715_MOESM2_ESM.pdf]

# **A Multicenter, Prospective, Observational Study to Determine Association of Mesangial C1q Deposition with Renal Outcomes in IgA Nephropathy**

Li Tan, MD <sup>1,5,6</sup>, Yi Tang, MD <sup>1</sup>, Gaiqin Pei, MD <sup>1,6</sup>, Zhengxia Zhong, MD <sup>2,6</sup>, Jiaxing Tan, MD <sup>1,6</sup>, Ling Zhou, MD <sup>3,6</sup>, Dongmei Wen, MD <sup>4,6</sup>, David Sheikh-Hamad, MD <sup>5</sup>, Wei Qin, MD <sup>1</sup>

<sup>1</sup> Division of Nephrology, Department of Medicine, West China Hospital, Sichuan University, Chengdu, Sichuan, China.

<sup>2</sup> Division of Nephrology, Department of Medicine, Affiliated Hospital of Zunyi Medical University, Medical University, Zunyi, Guizhou, China.

<sup>3</sup> Division of Nephrology, Zigong Third People's Hospital, Zigong, Sichuan, China.

<sup>4</sup> Division of Nephrology, People's Hospital of Jianyang, Chengdu, Sichuan, China.

<sup>5</sup> Section of Nephrology, Department of Medicine, Baylor College of Medicine, Houston, TX, USA.

<sup>6</sup> West China School of Medicine, Sichuan University, Chengdu, Sichuan, China.

Correspondence to: Wei Qin, Division of Nephrology, Department of Medicine, West China Hospital, Sichuan University, Chengdu, Sichuan, China. Tel. 86-28-85422338, Fax +86-028-8542-3341. Email [qinweihx@scu.edu.cn](mailto:qinweihx@scu.edu.cn).

A. All patients in the unmatched cohort

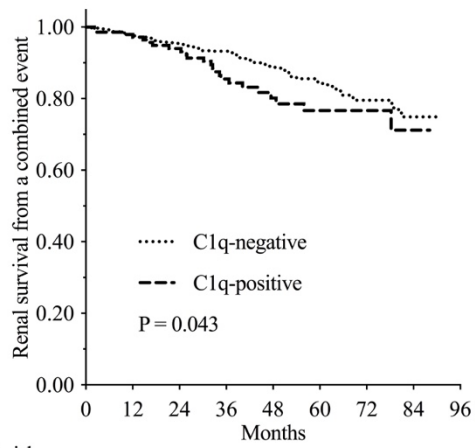

| NO. at risk  | 0   | 12  | 24  | 36  | 48  | 60  | 72  | 84 | 96 |
|--------------|-----|-----|-----|-----|-----|-----|-----|----|----|
| C1q-negative | 926 | 823 | 655 | 474 | 345 | 236 | 146 | 25 | 0  |
| C1q-positive | 145 | 122 | 97  | 73  | 56  | 41  | 21  | 5  | 0  |

B. All patients in the matched cohort (1:1 PSM)

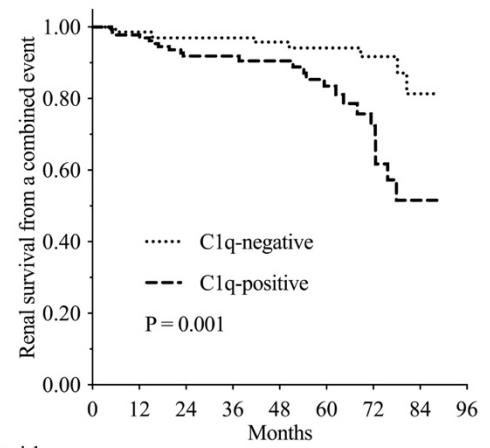

| NO. at risk  | 0   | 12  | 24  | 36 | 48 | 60 | 72 | 84 | 96 |
|--------------|-----|-----|-----|----|----|----|----|----|----|
| C1q-negative | 145 | 127 | 111 | 86 | 64 | 48 | 30 | 5  | 0  |
| C1q-positive | 145 | 122 | 97  | 73 | 56 | 41 | 21 | 5  | 0  |

**Supplementary Fig. S2. Kaplan-Meier analysis for the probability of composite endpoint.**
