# Supplementary material for: A multicenter, prospective, observational study to determine association of mesangial C1q deposition with renal outcomes in IgA nephropathy
Source: PubMed Central journal article supplement (PMC7943768; doi:10.1038/s41598-021-84715-7), 2021-03-09
Supplement: 41598_2021_84715_MOESM3_ESM.pdf [file 41598_2021_84715_MOESM3_ESM.pdf]

# **A Multicenter, Prospective, Observational Study to Determine Association of Mesangial C1q Deposition with Renal Outcomes in IgA Nephropathy**

Li Tan, MD <sup>1,5,6</sup>, Yi Tang, MD <sup>1</sup>, Gaiqin Pei, MD <sup>1,6</sup>, Zhengxia Zhong, MD <sup>2,6</sup>, Jiaying Tan, MD <sup>1,6</sup>, Ling Zhou, MD <sup>3,6</sup>, Dongmei Wen, MD <sup>4,6</sup>, David Sheikh-Hamad, MD <sup>5</sup>, Wei Qin, MD <sup>1</sup>

<sup>1</sup> Division of Nephrology, Department of Medicine, West China Hospital, Sichuan University, Chengdu, Sichuan, China.

<sup>2</sup> Division of Nephrology, Department of Medicine, Affiliated Hospital of Zunyi Medical University, Medical University, Zunyi, Guizhou, China.

<sup>3</sup> Division of Nephrology, Zigong Third People's Hospital, Zigong, Sichuan, China.

<sup>4</sup> Division of Nephrology, People's Hospital of Jianyang, Chengdu, Sichuan, China.

<sup>5</sup> Section of Nephrology, Department of Medicine, Baylor College of Medicine, Houston, TX, USA.

<sup>6</sup> West China School of Medicine, Sichuan University, Chengdu, Sichuan, China.

Correspondence to: Wei Qin, Division of Nephrology, Department of Medicine, West China Hospital, Sichuan University, Chengdu, Sichuan, China. Tel. 86-28-85422338, Fax +86-028-8542-3341. Email [qinweihx@scu.edu.cn](mailto:qinweihx@scu.edu.cn).

**TableS1. Demographic and Clinical Features of IgAN Patients.**

| Characteristics                        | Groups          |                           |                                          |  | P value | Matched Cohort (1:1 PSM)<br>C1q-negative (n=145) | P value |
|----------------------------------------|-----------------|---------------------------|------------------------------------------|--|---------|--------------------------------------------------|---------|
|                                        | All (n =1071)   | C1q-positive<br>(n = 145) | Unmatched cohort<br>C1q-negative (n=926) |  |         |                                                  |         |
| Clinical                               |                 |                           |                                          |  |         |                                                  |         |
| Age (year)                             | 33.80 ± 10.96   | 33.18 ± 10.94             | 33.89 ± 10.97                            |  | 0.466   | 34.05 ± 11.74                                    | 0.409   |
| Male (%)                               | 464 (43.32)     | 57 (39.31)                | 407 (43.95)                              |  | 0.290   | 57 (39.31)                                       | 0.962   |
| SBP (mmHg)                             | 130.63 ± 20.27  | 133.50 ± 21.36            | 130.18 ± 20.07                           |  | 0.066   | 131.89 ± 21.58                                   | 0.167   |
| DBP (mmHg)                             | 83.58 ± 14.21   | 85.78 ± 14.92             | 83.24 ± 14.07                            |  | 0.045   | 82.65 ± 14.61                                    | 0.153   |
| MAP (mmHg)                             | 99.26 ± 15.35   | 101.69 ± 16.45            | 98.88 ± 15.14                            |  | 0.041   | 99.06 ± 16.08                                    | 0.143   |
| Hypertension (%)                       | 374 (34.92)     | 58 (40.00)                | 316 (34.13)                              |  | 0.168   | 51 (35.17)                                       | 0.422   |
| Serum creatinine (µmol/L)              | 100.76 ± 53.06  | 107.60 ± 53.70            | 99.69 ± 52.90                            |  | 0.095   | 100.91 ± 54.89                                   | 0.296   |
| eGFR (ml/min per 1.73 m <sup>2</sup> ) | 87.48 ± 49.72   | 81.03 ± 34.84             | 88.49 ± 51.60                            |  | 0.027   | 87.12 ± 34.27                                    | 0.043   |
| Urinary protein (g/24h)                | 2.67 ± 2.99     | 3.27 ± 2.74               | 2.58 ± 3.02                              |  | 0.010   | 2.58 ± 2.47                                      | 0.026   |
| Serum albumin (g/L)                    | 38.15 ± 12.51   | 35.90 ± 7.96              | 38.50 ± 13.05                            |  | 0.020   | 37.94 ± 6.95                                     | 0.021   |
| Uric acid (µmol/L)                     | 378.79 ± 158.08 | 377.05 ± 106.72           | 379.06 ± 164.72                          |  | 0.887   | 371.92 ± 109.58                                  | 0.812   |
| CKD stage                              |                 |                           |                                          |  | 0.049   |                                                  | 0.399   |
| Stage 1                                | 531 (49.58)     | 63 (43.45)                | 468 (50.54)                              |  |         | 68 (46.90)                                       |         |
| Stage 2                                | 267 (24.93)     | 32 (22.07)                | 235 (25.38)                              |  |         | 40 (27.59)                                       |         |
| Stage 3                                | 219 (20.45)     | 42 (28.97)                | 177 (19.11)                              |  |         | 31 (21.38)                                       |         |
| Stage 4                                | 54 (5.04)       | 8 (5.52)                  | 46 (4.97)                                |  |         | 6 (4.14)                                         |         |
| Treatment                              |                 |                           |                                          |  | 0.043   |                                                  | 0.972   |
| SC                                     | 411 (38.38)     | 42 (28.97)                | 369 (39.85)                              |  |         | 42 (28.97)                                       |         |
| CS                                     | 390 (36.41)     | 61 (42.07)                | 329 (35.53)                              |  |         | 61 (42.07)                                       |         |
| IT                                     | 270 (25.21)     | 42 (28.97)                | 228 (24.62)                              |  |         | 42 (28.97)                                       |         |

*Note: Values for categorical variables are given as number (percentage); values for continuous variables are given as mean ± standard deviation or median (interquartile range). Abbreviations: SBP, systolic blood pressure; DBP, diastolic blood pressure; MAP, mean arterial pressure; eGFR, estimated glomerular filtration rate; CKD, chronic kidney disease; SC, supportive care group; CS, corticosteroids; IT, immunosuppressive therapy.*
