# Supplementary material for: A multicenter, prospective, observational study to determine association of mesangial C1q deposition with renal outcomes in IgA nephropathy
Source: PubMed Central journal article supplement (PMC7943768; doi:10.1038/s41598-021-84715-7), 2021-03-09
Supplement: 41598_2021_84715_MOESM4_ESM.pdf [file 41598_2021_84715_MOESM4_ESM.pdf]

# **A Multicenter, Prospective, Observational Study to Determine Association of Mesangial C1q Deposition with Renal Outcomes in IgA Nephropathy**

Li Tan, MD <sup>1,5,6</sup>, Yi Tang, MD <sup>1</sup>, Gaiqin Pei, MD <sup>1,6</sup>, Zhengxia Zhong, MD <sup>2,6</sup>, Jiaying Tan, MD <sup>1,6</sup>, Ling Zhou, MD <sup>3,6</sup>, Dongmei Wen, MD <sup>4,6</sup>, David Sheikh-Hamad, MD <sup>5</sup>, Wei Qin, MD <sup>1</sup>

<sup>1</sup> Division of Nephrology, Department of Medicine, West China Hospital, Sichuan University, Chengdu, Sichuan, China.

<sup>2</sup> Division of Nephrology, Department of Medicine, Affiliated Hospital of Zunyi Medical University, Medical University, Zunyi, Guizhou, China.

<sup>3</sup> Division of Nephrology, Zigong Third People's Hospital, Zigong, Sichuan, China.

<sup>4</sup> Division of Nephrology, People's Hospital of Jianyang, Chengdu, Sichuan, China.

<sup>5</sup> Section of Nephrology, Department of Medicine, Baylor College of Medicine, Houston, TX, USA.

<sup>6</sup> West China School of Medicine, Sichuan University, Chengdu, Sichuan, China.

Correspondence to: Wei Qin, Division of Nephrology, Department of Medicine, West China Hospital, Sichuan University, Chengdu, Sichuan, China. Tel. 86-28-85422338, Fax +86-028-8542-3341. Email [qinweihx@scu.edu.cn](mailto:qinweihx@scu.edu.cn).

**TableS2. Pathologic Features of IgAN Patients.**

| Characteristics       | All (n =1071) | Groups                 |                                          | P value | Matched Cohort (1:1 PSM)<br>C1q-negative (n=145) | P value |
|-----------------------|---------------|------------------------|------------------------------------------|---------|--------------------------------------------------|---------|
|                       |               | C1q-positive (n = 145) | Unmatched cohort<br>C1q-negative (n=926) |         |                                                  |         |
| Pathologic            |               |                        |                                          |         |                                                  |         |
| Oxford Classification |               |                        |                                          |         |                                                  |         |
| M1                    | 805 (75.16)   | 118 (81.38)            | 687 (74.19)                              | 0.062   | 112 (77.24)                                      | 0.384   |
| E1                    | 56 (5.23)     | 19 (13.10)             | 37 (4.00)                                | <0.001  | 8 (5.52)                                         | 0.026   |
| S                     | 542 (50.61)   | 66 (45.52)             | 476 (51.40)                              | 0.187   | 79 (54.48)                                       | 0.127   |
| T0                    | 836 (78.06)   | 102 (70.34)            | 734 (79.27)                              | 0.007   | 120 (82.76)                                      | 0.044   |
| T1                    | 190 (17.74)   | 39 (26.90)             | 151(16.31)                               |         | 23 (15.86)                                       |         |
| T2                    | 45 (4.20)     | 4 (2.76)               | 41 (4.43)                                |         | 2 (1.38)                                         |         |
| C0                    | 762 (71.15)   | 92 (63.45)             | 670 (72.35)                              | <0.001  | 109 (75.17)                                      | 0.044   |
| C1                    | 243 (22.69)   | 33 (22.76)             | 210 (22.68)                              |         | 27 (18.62)                                       |         |
| C2                    | 66 (6.16)     | 20 (13.79)             | 46 (4.97)                                |         | 9 (6.21)                                         |         |
| IgA deposition        |               |                        |                                          | 0.530   |                                                  | 0.942   |
| 1+                    | 116 (10.83)   | 20 (13.79)             | 96 (10.37)                               |         | 21 (14.48)                                       |         |
| 2+                    | 495 (46.22)   | 62 (42.76)             | 433 (46.76)                              |         | 62 (42.76)                                       |         |
| 3+                    | 454 (42.39)   | 62 (42.76)             | 392 (42.33)                              |         | 60 (41.38)                                       |         |
| 4+                    | 6 (0.56%)     | 1 (0.69)               | 5 (0.54)                                 |         | 2 (1.38)                                         |         |
| IgG deposition        | 97 (9.06)     | 32 (22.07)             | 65 (7.02)                                | <0.001  | 14 (9.66)                                        | 0.004   |
| IgM deposition        | 521 (48.65)   | 127 (87.59)            | 394 (42.55)                              | <0.001  | 72 (49.66)                                       | <0.001  |
| C3 deposition         | 876 (81.79)   | 124 (85.52)            | 752 (81.21)                              | 0.211   | 119 (82.07)                                      | 0.426   |
| C4 deposition         | 52 (4.86)     | 33 (22.76)             | 19 (2.05)                                | <0.001  | 8 (5.52)                                         | <0.001  |

*Note: Values for categorical variables are given as number (percentage); values for continuous variables are given as mean ± standard deviation or median (interquartile range).*

Abbreviations: M, mesangial proliferation; E, endocapillary proliferation; S, segmental sclerosis; T, tubular atrophy/interstitial fibrosis; C, crescents.
