# Supplementary material for: A multicenter, prospective, observational study to determine association of mesangial C1q deposition with renal outcomes in IgA nephropathy
Source: PubMed Central journal article supplement (PMC7943768; doi:10.1038/s41598-021-84715-7), 2021-03-09
Supplement: 41598_2021_84715_MOESM5_ESM.pdf [file 41598_2021_84715_MOESM5_ESM.pdf]

# **A Multicenter, Prospective, Observational Study to Determine Association of Mesangial C1q Deposition with Renal Outcomes in IgA Nephropathy**

Li Tan, MD <sup>1,5,6</sup>, Yi Tang, MD <sup>1</sup>, Gaiqin Pei, MD <sup>1,6</sup>, Zhengxia Zhong, MD <sup>2,6</sup>, Jiaying Tan, MD <sup>1,6</sup>, Ling Zhou, MD <sup>3,6</sup>, Dongmei Wen, MD <sup>4,6</sup>, David Sheikh-Hamad, MD <sup>5</sup>, Wei Qin, MD <sup>1</sup>

<sup>1</sup> Division of Nephrology, Department of Medicine, West China Hospital, Sichuan University, Chengdu, Sichuan, China.

<sup>2</sup> Division of Nephrology, Department of Medicine, Affiliated Hospital of Zunyi Medical University, Medical University, Zunyi, Guizhou, China.

<sup>3</sup> Division of Nephrology, Zigong Third People's Hospital, Zigong, Sichuan, China.

<sup>4</sup> Division of Nephrology, People's Hospital of Jianyang, Chengdu, Sichuan, China.

<sup>5</sup> Section of Nephrology, Department of Medicine, Baylor College of Medicine, Houston, TX, USA.

<sup>6</sup> West China School of Medicine, Sichuan University, Chengdu, Sichuan, China.

Correspondence to: Wei Qin, Division of Nephrology, Department of Medicine, West China Hospital, Sichuan University, Chengdu, Sichuan, China. Tel. 86-28-85422338, Fax +86-028-8542-3341. Email [qinweihx@scu.edu.cn](mailto:qinweihx@scu.edu.cn).

**TableS3. Clinical outcome of IgAN patients.**

|                               | <b>CR</b>   | <b>PR</b>   | <b>NR</b>   | <b>ESRD/ Death</b> |
|-------------------------------|-------------|-------------|-------------|--------------------|
| Before PS matching (n=1071)   |             |             |             |                    |
| C1-positive (n=145)           | 76 (52.4%)  | 14 (9.7%)   | 32 (22.1%)  | 23 (15.9%)         |
| C1-negative (n=926)           | 589 (63.6%) | 102 (11.0%) | 133 (14.4%) | 102 (11.0%)        |
| After 1:1 PS matching (n=290) |             |             |             |                    |
| C1-positive (n=145)           | 76 (52.4%)  | 14 (9.7%)   | 32 (22.1%)  | 23 (15.9%)         |
| C1-negative (n=145)           | 101 (69.7%) | 18(12.4%)   | 17 (11.7%)  | 9 (6.2%)           |

Note: Values for categorical variables are given as number (percentage). Abbreviations: CR, complete remission; PR, partial remission; NR, no response; ESRD, end stage renal disease.
