# Supplementary material for: A multicenter, prospective, observational study to determine association of mesangial C1q deposition with renal outcomes in IgA nephropathy
Source: PubMed Central journal article supplement (PMC7943768; doi:10.1038/s41598-021-84715-7), 2021-03-09
Supplement: 41598_2021_84715_MOESM6_ESM.pdf [file 41598_2021_84715_MOESM6_ESM.pdf]

# **A Multicenter, Prospective, Observational Study to Determine Association of Mesangial C1q Deposition with Renal Outcomes in IgA Nephropathy**

Li Tan, MD <sup>1,5,6</sup>, Yi Tang, MD <sup>1</sup>, Gaiqin Pei, MD <sup>1,6</sup>, Zhengxia Zhong, MD <sup>2,6</sup>, Jiaying Tan, MD <sup>1,6</sup>, Ling Zhou, MD <sup>3,6</sup>, Dongmei Wen, MD <sup>4,6</sup>, David Sheikh-Hamad, MD <sup>5</sup>, Wei Qin, MD <sup>1</sup>

<sup>1</sup> Division of Nephrology, Department of Medicine, West China Hospital, Sichuan University, Chengdu, Sichuan, China.

<sup>2</sup> Division of Nephrology, Department of Medicine, Affiliated Hospital of Zunyi Medical University, Medical University, Zunyi, Guizhou, China.

<sup>3</sup> Division of Nephrology, Zigong Third People's Hospital, Zigong, Sichuan, China.

<sup>4</sup> Division of Nephrology, People's Hospital of Jianyang, Chengdu, Sichuan, China.

<sup>5</sup> Section of Nephrology, Department of Medicine, Baylor College of Medicine, Houston, TX, USA.

<sup>6</sup> West China School of Medicine, Sichuan University, Chengdu, Sichuan, China.

Correspondence to: Wei Qin, Division of Nephrology, Department of Medicine, West China Hospital, Sichuan University, Chengdu, Sichuan, China. Tel. 86-28-85422338, Fax +86-028-8542-3341. Email [qinweihx@scu.edu.cn](mailto:qinweihx@scu.edu.cn).

**TableS4. Cox Proportional Hazard Model for the Primary Endpoint in IgA Nephropathy Patients with CKD.**

|                      | Unmatched cohort     |         | Matched cohort (1:1 PSM) |         |
|----------------------|----------------------|---------|--------------------------|---------|
|                      | HR (95%CI)           | P       | HR (95%CI)               | P       |
| Hypertension         | 1.226 (0.792-1.898)  | 0.361   | 4.116 (2.390-7.089)      | < 0.001 |
| Serum creatinine     | 1.007 (1.004-1.009)  | < 0.001 | 1.010 (1.006-1.017)      | < 0.001 |
| Urinary protein      | 1.093 (1.023-1.168)  | 0.009   | 1.078 (1.020-1.140)      | 0.008   |
| Pathologic<br>Oxford |                      |         |                          |         |
| M1                   | 0.463 (0.298-0.721)  | 0.001   | 2.172 (0.870-5.550)      | 0.112   |
| E1                   | 1.877 (0.883-3.991)  | 0.102   | 2.708 (1.105-6.635)      | 0.029   |
| S                    | 0.921 (0.637-1.331)  | 0.662   | 1.077 (0.65-1.784)       | 0.774   |
| T0                   | 1                    | -       | 1                        | -       |
| T1                   | 4.305 (2.577-7.192)  | < 0.001 | 3.382 (1.767-6.472)      | < 0.001 |
| T2                   | 6.543 (3.581-11.955) | < 0.001 | 10.901 (4.767-24.931)    | < 0.001 |
| C1/C2                | 0.835 (0.540-1.291)  | 0.417   | 0.615 (0.354-1.067)      | 0.084   |
| C1q deposition       | 1.659 (1.039-2.650)  | 0.034   | 2.106 (1.216-3.647)      | 0.008   |
| C3 deposition        | 1.965 (1.186-3.305)  | 0.011   | 0.838 (0.406-1.728)      | 0.632   |
| C4 deposition        | 0.792 (0.335-1.876)  | 0.597   | 0.480 (0.179-1.288)      | 0.145   |

Abbreviations: HR, hazard ratio; 95 % CI, 95 % confidence interval; M, mesangial proliferation; E, endocapillary proliferation; S, segmental sclerosis; T, tubular atrophy/interstitial fibrosis;

C, crescents.
